# Supplementary material for: Culture-dependent enumeration methods failed to simultaneously detect disinfectant-injured and genetically modified Escherichia coli in drinking water
Source: Royal Society of Chemistry journal article supplement (doi:10.1039/c6em00625f), 2017-01-01
Supplement: c6em00625f1.pdf [file c6em00625f1.pdf]

Supporting information

**Culture-dependent enumeration methods failed to simultaneously detect disinfectant-injured and genetically-modified Escherichia coli in drinking water**

Jing Li,<sup>1,#</sup> Lu Liu,<sup>1,#</sup> Dong Yang,<sup>1,#</sup> Wei-Li Liu,<sup>1</sup> Zhi-Qiang Shen,<sup>1</sup> Zhi-Gang Qiu,<sup>1</sup> Ai-ming Hou,<sup>1</sup> Da-Ning Wang,<sup>1</sup> Chen-Shi Ding,<sup>1</sup> Jun-Wen Li,<sup>1</sup> Hong-Mei Qu,<sup>2</sup> Jian-Hua Guo,<sup>3\*</sup> Min Jin

<sup>1\*</sup>

<sup>1</sup>Department of Environment and Health, Tianjin Institute of Health and Environmental Medicine, Key Laboratory of Risk Assessment and Control for Environment & Food Safety, Tianjin 300050, China;

<sup>2</sup>College of Chemical Engineering and Technology, Tianjin University, Tianjin 300072, China;

<sup>3</sup>Advanced Water Management Centre, University of Queensland, St Lucia, Brisbane, QLD 4072, Australia.

**\*Corresponding author:** Min Jin, Telephone: +86-22-84655418; E-mail: [jinminzh@126.com](mailto:jinminzh@126.com); Jianhua Guo, Telephone: +61-7-33463215; E-mail: [j.guo@awmc.uq.edu.au](mailto:j.guo@awmc.uq.edu.au);

This supporting document includes 1 figure and 3 tables.

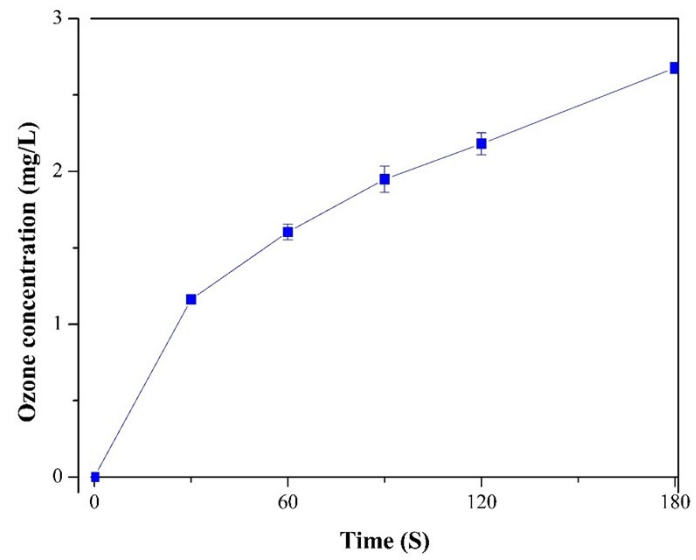

Figure S1. Ozone concentration in PBS buffer without *E. coli* as a function of time (pH 7.2, 20 °C).

Table S1. Comparison of detection rate of injured *E. coli* K12 by different enumeration methods

| Trial | Chlorine-injured |                    |     |     |      | Ozone-injured |                    |      |     |      |
|-------|------------------|--------------------|-----|-----|------|---------------|--------------------|------|-----|------|
|       | Injury (%)       | Detection rate (%) |     |     |      | Injury (%)    | Detection rate (%) |      |     |      |
|       |                  | MF                 | MTF | EST | TSM  |               | MF                 | MTF  | EST | TSM  |
| 1     | 45.1             | 0                  | 100 | 0   | 68.8 | 73.7          | 0                  | 100  | 0   | 73.3 |
| 2     | 58.3             | 0                  | 100 | 0   | 77.0 | 92.1          | 0                  | 100  | 3   | 95.3 |
| 3     | 69.2             | 0                  | 100 | 0   | 33.3 | 96.2          | 0                  | 98.2 | 0.7 | 91.4 |
| 4     | 70               | 0                  | 100 | 0   | 28.8 | 97.7          | 0                  | 56.0 | 4.6 | 33.3 |
| 5     | 80               | 0                  | 100 | 0   | 100  | 100           | 0                  | 21.7 | 0   | 30.4 |
| 6     | 80               | 0                  | 100 | 0   | 100  | –             | –                  | –    | –   | –    |
| 7     | 90.8             | 0                  | 100 | 0   | 50.8 | –             | –                  | –    | –   | –    |
| 8     | 95.4             | 0                  | 100 | 0   | 43.4 | –             | –                  | –    | –   | –    |

Table S2. Comparison of detection rates of injured *E. coli* HB101 by different enumeration methods

| Trial | Chlorine-injured |                    |     |      |     | Ozone-injured |                    |     |      |     |
|-------|------------------|--------------------|-----|------|-----|---------------|--------------------|-----|------|-----|
|       | Injury (%)       | Detection rate (%) |     |      |     | Injury (%)    | Detection rate (%) |     |      |     |
|       |                  | MF                 | MTF | EST  | TSM |               | MF                 | MTF | EST  | TSM |
| 1     | 67.4             | 0                  | 0   | 0    | 0   | 53.0          | 0                  | 1.4 | 0    | 0   |
| 2     | 98.7             | 0                  | 0   | 39.5 | 0   | 73.1          | 0                  | 2.8 | 0    | 0   |
| 3     | 98.9             | 0                  | 0   | 20   | 0   | 100           | 0                  | 0   | 0    | 0   |
| 4     | 99.1             | 0                  | 0   | 0    | 0   | 100           | 0                  | 0   | 0    | 0   |
| 5     | 100              | 0                  | 0   | 0    | 0   | 100           | 0                  | 8.7 | 25.7 | 0   |
| 6     | 100              | 0                  | 0   | 15.5 | 0   | 100           | 0                  | 0   | 5.8  | 0   |
| 7     | 100              | 0                  | 0   | 45.4 | 0   | 100           | 0                  | 0   | 2.9  | 0   |
| 8     | 100              | 0                  | 0   | 0    | 0   | 100           | 0                  | 0   | 2.1  | 0   |

Table S3. Comparison of detection rates of injured *E. coli* HB101 (pUC18) by different enumeration methods

| Trial | Chlorine-injured |                    |     |      |     | Ozone-injured |                    |      |      |     |
|-------|------------------|--------------------|-----|------|-----|---------------|--------------------|------|------|-----|
|       | Injury (%)       | Detection rate (%) |     |      |     | Injury (%)    | Detection rate (%) |      |      |     |
|       |                  | MF                 | MTF | EST  | TSM |               | MF                 | MTF  | EST  | TSM |
| 1     | 100              | 0                  | 0   | 53.6 | 0   | 100           | 0                  | 0    | 0    | 0   |
| 2     | 100              | 0                  | 0   | 0    | 0   | 100           | 0                  | 21.5 | 0    | 0   |
| 3     | 100              | 0                  | 0   | 45.4 | 4.3 | 100           | 0                  | 0    | 0    | 0   |
| 4     | 100              | 0                  | 0   | 34.9 | 0   | 100           | 0                  | 0    | 19.5 | 0   |
| 5     | 100              | 0                  | 0   | 15   | 3.7 | —             | —                  | —    | —    | —   |
| 6     | 100              | 0                  | 0   | 29.8 | 2.2 | —             | —                  | —    | —    | —   |
| 7     | 100              | 0                  | 0   | 17.9 | 0   | —             | —                  | —    | —    | —   |
| 8     | 100              | 0                  | 0   | 16.8 | 3.2 | —             | —                  | —    | —    | —   |
